# Supplementary material
Source: PubMed Central journal article supplement (PMC8187393)
Supplement: 41431_2020_754_MOESM1_ESM.pdf [file 41431_2020_754_MOESM1_ESM.pdf]

**Supplementary Table 1:** Identified variants in Arab individuals with sporadic and autosomal recessive rod cone dystrophy.

| <i>Gene</i>    | Ref_Seq                    | Change at DNA level        | Change at Protein level        | Family/<br>sample ID | N | Origin         | Authors          | Year |
|----------------|----------------------------|----------------------------|--------------------------------|----------------------|---|----------------|------------------|------|
| <i>ABCA4</i>   | NM_000350.2                | c.4793C>A                  | p.(Ala1598Asp)                 | arRP-F007            | 2 | KSA            | Abu-Safieh et al | 2013 |
| <i>ABCA4</i>   | NM_000350.2                | c.4316G>A                  | p.(Gly1439Asp)                 | arRP-F119            | 1 | KSA            | Abu-Safieh et al | 2013 |
| <i>ABCA4</i>   | NM_000350.2                | c.4316G>A                  | p.(Gly1439Asp)                 | sRP-018              | 1 | KSA            | Abu-Safieh et al | 2013 |
| <i>ABCA4</i>   | NM_000350.2                | c.5391_5392del             | p.(Ala1798*)                   | 09DG00134            | 1 | KSA            | Patel et al      | 2016 |
| <i>ABCA4</i>   | NM_000350.2                | c.1630_1633dup             | p.(Asn545Argfs*12)             | 09DG00194            | 1 | KSA            | Patel et al      | 2016 |
| <i>ABCA4</i>   | NM_000350.2                | [c.2815G>T];[c.1615del]    | p.[(Glu939*);(Leu539Serfs*29)] | 10DG1130             | 1 | KSA            | Patel et al      | 2016 |
| <i>ABCA4</i>   | NM_000350.2                | [c.1140T>A];[c.5642C>G]    | p.[(Asn380Lys);(Ala1881Gly)]   | 11DG2106             | 1 | KSA            | Patel et al      | 2016 |
| <i>ABCA4</i>   | NM_000350.2                | c.5391_5392del             | p.(Ala1798*)                   | 13DG2102             | 1 | KSA            | Patel et al      | 2016 |
| <i>ABCA4</i>   | NM_000350.2                | [c.3482G>A];[c.5917del] ** | p.[(Arg1161His);(Val1973*)]    | 09DG01320            | 4 | Syrian         | Patel et al      | 2018 |
| <i>ABCA4</i>   | NG_009073.1(NM_000350.2)   | c.5460+1G>A                | p.(=)                          | F1A                  | 4 | Jordan         | Abu-Ameerh et al | 2019 |
| <i>AGBL5</i>   | NM_021831.5                | c.1255dup                  | p.(Thr419Asnfs*32)             | 16                   | 1 | Emirates Arab  | Khan A O         | 2019 |
| <i>ARL2BP</i>  | NG_033905.1(NM_012106.3)   | c.101-1G>C                 | p.(=)                          | MOL0807              | 1 | muslim Morocco | Davidson et al   | 2013 |
| <i>ARL2BP</i>  | NG_033905.1(NM_012106.3)   | c.207+1G>T                 | p.(=)                          | -                    | 2 |                | Audo et al       | 2017 |
| <i>ARL6</i>    | NM_177976.2                | c.266C>T **                | p.(Ala89Val)                   | DGU-F15              | 4 | KSA            | Aldahmesh et al  | 2009 |
| <i>ARL6</i>    | NM_177976.2                | c.362G>A                   | p.(Arg121His)                  | 11DG2051             | 1 | KSA            | Patel et al      | 2016 |
| <i>BBS2</i>    | NM_031885.3                | c.943C>T                   | p.(Arg315Trp)                  | 10DG1111             | 1 | KSA            | Patel et al      | 2016 |
| <i>C8orf37</i> | NM_177965.3                | c.529C>T                   | p.(Arg177Trp)                  | 11DG1769             | 1 | KSA            | Patel et al      | 2016 |
| <i>C8orf37</i> | NM_177965.3                | c.529C>T                   | p.(Arg177Trp)                  | 12DG0138             | 1 | KSA            | Patel et al      | 2016 |
| <i>CERKL</i>   | NM_201548.4                | c.734T>C                   | p.(Leu245Pro)                  | sRP-045              | 1 | KSA            | Abu-Safieh et al | 2013 |
| <i>CERKL</i>   | NM_201548.4                | c.734T>C                   | p.(Leu245Pro)                  | -                    | 1 | KSA            | Khan et al       | 2015 |
| <i>CERKL</i>   | NM_001030311.2             | c.999C>A                   | p.(Cys333*)                    | -                    | 1 | KSA            | Khan et al       | 2015 |
| <i>CERKL</i>   | NM_001030311.2             | c.890T>C                   | p.(Ile297Thr)                  | 11DG2308             | 1 | KSA            | Patel et al      | 2016 |
| <i>CERKL</i>   | NG_021178.2(NM_01030313.2) | c.238+1G>A                 | p.(=)                          | 12DG0401             | 1 | KSA            | Patel et al      | 2016 |
| <i>CERKL</i>   | NG_021178.2(NM_01548.4)    | c.1151+3_1151+6del **      | p.(=)                          | F12                  | 2 | Tunisia        | Habibi et al     | 2016 |
| <i>CERKL</i>   | NG_021178.2(NM_01548.4)    | c.1151+3_1151+6del **      | p.(=)                          | F13                  | 1 | Tunisia        | Habibi et al     | 2016 |
| <i>CERKL</i>   | NG_021178.2(NM_01548.4)    | c.1151+3_1151+6del **      | p.(=)                          | F14                  | 1 | Tunisia        | Habibi et al     | 2016 |

|              |                          |                       |                       |           |        |         |                  |      |
|--------------|--------------------------|-----------------------|-----------------------|-----------|--------|---------|------------------|------|
| <i>CERKL</i> | NG_021178.2(NM_201548.4) | c.1151+3_1151+6del ** | p.(=)                 | F15       | 1      | Tunisia | Habibi et al     | 2016 |
| <i>CERKL</i> | NM_001030311.2           | c.999C>A              | p.(Cys333*)           | 12DG0399  | 2      | KSA     | Patel et al      | 2018 |
| <i>CERKL</i> | NM_201548.4              | c.1187_1188del **     | p.(Gln396Argfs*20) ** | F1: V-30  | 1      | Jordan  | Azab B et al     | 2019 |
| <i>CNGB1</i> | NM_001297.1              | c.2957A>T             | p.(Lys986Met)         | sRP-005   | 1      | KSA     | Abu-Safieh et al | 2013 |
| <i>CNGB1</i> | NM_001297.4              | c.2957A>T             | p.(Asn986Ile)         | 12DG0391  | 1      | KSA     | Patel et al      | 2016 |
| <i>CNGB1</i> | NM_001297.4              | c.2957A>T             | p.(Asn986Ile)         | 12DG1256  | 1      | KSA     | Patel et al      | 2016 |
| <i>CNGB1</i> | NM_001297.4              | c.2294G>T             | p.(Arg765Leu)         | 12DG2309  | 1      | KSA     | Patel et al      | 2016 |
| <i>CNGB1</i> | NM_001297.4              | c.2293C>T             | p.(Arg765Cys)         | F2        | 2      | Tunisia | Habibi et al     | 2016 |
| <i>CRB1</i>  | NM_201253.1              | c.3159T>G             | p.(Cys1053Trp)        | DGU-F11   | 4      | KSA     | Aldahmesh et al  | 2009 |
| <i>CRB1</i>  | NM_201253.1              | c.80G>C               | p.(Cys27Phe)          | DGU-F12   | 1      | KSA     | Aldahmesh et al  | 2009 |
| <i>CRB1</i>  | NM_201253.2              | c.3495T>G             | p.(Cys1165Trp)        | arRP-F030 | 2      | KSA     | Abu-Safieh et al | 2013 |
| <i>CRB1</i>  | NM_201253.2              | c.1429G>A             | p.(Gly477Arg)         | arRP-F062 | 3      | KSA     | Abu-Safieh et al | 2013 |
| <i>CRB1</i>  | NM_201253.2              | c.2024G>A             | p.(Trp675*)           | sRP-014   | 1      | KSA     | Abu-Safieh et al | 2013 |
| <i>CRB1</i>  | NM_201253.2              | c.80G>T               | p.(Cys27Phe)          | sRP-086   | 1      | KSA     | Abu-Safieh et al | 2013 |
| <i>CRB1</i>  | NM_201253.2              | c.2234C>T             | p.(Thr745Met)         | sRP-087   | 1      | KSA     | Abu-Safieh et al | 2013 |
| <i>CRB1</i>  | NM_201253.2              | c.1772_1775del **     | p.(Cys591Serfs*29) ** | -         | 2      | Lebanon | Jalkh et al      | 2014 |
| <i>CRB1</i>  | NM_201253.2              | c.1180T>C             | p.(Cys394Arg)         | 09DG00277 | 1      | KSA     | Patel et al      | 2016 |
| <i>CRB1</i>  | NM_201253.2              | c.2330_2336del        | p.(Pro777Leufs*4)     | 10DG0001  | 1      | KSA     | Patel et al      | 2016 |
| <i>CRB1</i>  | NM_201253.2              | c.1180T>C             | p.(Cys394Arg)         | 10DG1183  | 1      | KSA     | Patel et al      | 2016 |
| <i>CRB1</i>  | NM_201253.2              | c.1180T>C             | p.(Cys394Arg)         | 11DG1394  | 1      | KSA     | Patel et al      | 2016 |
| <i>CRB1</i>  | NM_201253.2              | c.2701G>T             | p.(Val901Phe)         | 12DG0833  | 1      | KSA     | Patel et al      | 2016 |
| <i>CRB1</i>  | NM_201253.2              | c.80G>T               | p.(Cys27Phe)          | 13DG0249  | 1      | KSA     | Patel et al      | 2016 |
| <i>CRB1</i>  | NM_201253.2              | c.1463T>C             | p.(Phe488Ser)         | 14DG2055  | 1      | KSA     | Patel et al      | 2016 |
| <i>EMC1</i>  | NM_015047.3              | c.430G>A              | p.(Ala144Thr)         | sRP-001   | 1      | KSA     | Abu-Safieh et al | 2013 |
| <i>EYS</i>   | NM_001142800.1           | c.32dup               | p.(Met12Aspfs*14)     | arPR-F027 | 5      | KSA     | Abu-Safieh et al | 2013 |
| <i>EYS</i>   | NM_001142800.1           | c.6050G>T             | p.(Gly2017Val)        | arRP-F098 | 1      | KSA     | Abu-Safieh et al | 2013 |
| <i>EYS</i>   | NM_001142800.1           | c.6050G>T             | p.(Gly2017Val)        | sRP-007   | 1      | KSA     | Abu-Safieh et al | 2013 |
| <i>EYS</i>   | NM_001142800.1           | c.179del              | p.(Leu60Trpfs*3)      | 10DG1649  | 1      | KSA     | Patel et al      | 2016 |
| <i>EYS</i>   | NM_001142800.1           | c.910dup **           | p.(Trp304Leufs*9) **  | -         | 1<br>2 | KSA     | Hashmi et al     | 2018 |

|                |                              |                                        |                       |               |   |           |                  |      |
|----------------|------------------------------|----------------------------------------|-----------------------|---------------|---|-----------|------------------|------|
| <i>EYS</i>     | NM_001142800.1               | c.875_888delinsTTT                     | p.(Glu292Valfs*17)    | 16DG0629      | 2 | KSA       | Patel et al      | 2018 |
| <i>FAM161A</i> | NM_001201543                 | c.1003C>T                              | p.(Arg335*)           | AQ09          | 2 | Palestine | Zobor et al      | 2014 |
| <i>FAM161A</i> | NM_032180.2                  | c.685C>T                               | p.(Arg229*)           | 09DG00352     | 1 | KSA       | Patel et al      | 2016 |
| <i>FAM161A</i> | NM_032180.2                  | c.685C>T                               | p.(Arg229*)           | 11DG1421      | 1 | KSA       | Patel et al      | 2016 |
| <i>FAM161A</i> | NM_032180.2                  | c.685C>T                               | p.(Arg229*)           | 11DG1804      | 1 | KSA       | Patel et al      | 2016 |
| <i>FAM161A</i> | NM_001201543                 | c.678_681del **                        | p.(Lys227Asnfs*17)    | F11           | 2 | Tunisia   | Habibi et al     | 2016 |
| <i>GPR125</i>  | NM_145290.3                  | c.2504C>G                              | p.(Ser835Cys)         | sRP-022       | 1 | KSA       | Abu-Safieh et al | 2013 |
| <i>GPR125</i>  | NM_145290.3                  | c.2504C>G                              | p.(Ser835Cys)         | 09DG00459     | 1 | KSA       | Patel et al      | 2016 |
| <i>IMPG2</i>   | NM_016247.3                  | c.2346_2347del                         | p.(Arg782Serfs*24)    | arRP-F071     | 4 | KSA       | Abu-Safieh et al | 2013 |
| <i>IMPG2</i>   | NM_016247.3                  | c.2346_2347del                         | p.(Arg782Serfs*24)    | 09DG01587     | 1 | KSA       | Patel et al      | 2016 |
| <i>IMPG2</i>   | NM_016247.3                  | c.2274G>A                              | p.(Trp758*)           | 11DG2068      | 1 | KSA       | Patel et al      | 2016 |
| <i>IMPG2</i>   | NM_016247.3                  | c.2274G>A                              | p.(Trp758*)           | 12DG0554      | 1 | KSA       | Patel et al      | 2016 |
| <i>IMPG2</i>   | NM_016247.3                  | c.513T>G                               | p.(Tyr171*)           | 12DG1252      | 1 | KSA       | Patel et al      | 2016 |
| <i>IMPG2</i>   | NM_016247.3                  | c.2274G>A                              | p.(Trp758*)           | 12DG2330      | 1 | KSA       | Patel et al      | 2016 |
| <i>IMPG2</i>   | NM_016247.3                  | c.909-802_1154-539del                  | p.(Gly304Glu fs*9) ** | 09DG00922     | 6 | KSA       | Patel et al      | 2018 |
| <i>IMPG2</i>   | NM_016247.3                  | c.2274G>A                              | p.(Trp758*)           | 15DG0195      | 1 | KSA       | Patel et al      | 2018 |
| <i>IMPG2</i>   | NM_016247.3                  | c.2274G>A                              | p.(Trp758*)           | 15DG2178      | 3 | KSA       | Patel et al      | 2018 |
| <i>IMPG2</i>   | NM_016247.3                  | c.189dup                               | p.(Gln64Thrfs*9)      | Fam 1         | 4 | Emirates  | Khan et al       | 2019 |
| <i>IMPG2</i>   | NM_016247.3                  | c.189dup                               | p.(Gln64Thrfs*9)      | Fam 2         | 1 | Emirates  | Khan et al       | 2019 |
| <i>IMPG2</i>   | NG_028284.1<br>(NM_016247.3) | c.533+4_533+7del                       | p.(=)                 | Fam 3         | 1 | Emirates  | Khan et al       | 2019 |
| <i>IMPG2</i>   | NM_016247.3                  | c.3262C>T                              | p.(Arg1088*)          | Fam 4         | 1 | Emirates  | Khan et al       | 2019 |
| <i>LRAT</i>    | NM_004744.4                  | c.233_242del                           | p.(Leu78Argfs*85)     | 12DG1182      | 1 | KSA       | Patel et al      | 2016 |
| <i>LRAT</i>    | NM_004744.3                  | c.241_242del                           | p.(Leu81Aspfs*40)     | 12DG0405      | 1 | KSA       | Patel et al      | 2018 |
| <i>MERTK</i>   | NM_006343.2<br>NG_011607.1   | c.1335_1336del                         | p.(Ala446Serfs*28) ** | DGU-F16       | 3 | KSA       | Aldahmesh et al  | 2009 |
| <i>MERTK</i>   | (NM_006343.2)                | c.(1144+1_1145-1)_(1296+1_1297-1)del** | -                     | Second Family | 0 | KSA       | Mackay et al     | 2010 |
| <i>MERTK</i>   | NM_006343.2                  | c.2323C>T                              | p.(Arg775*)           | -             | 3 | Morocco   | Ksantini et al   | 2012 |
| <i>MERTK</i>   | NM_006343.2                  | c.2214del                              | p.(Cys738Trpfs*32)    | 10DG1152      | 1 | KSA       | Patel et al      | 2016 |
| <i>MERTK</i>   | NM_006343.2                  | c.2214del                              | p.(Cys738Trpfs*32)    | 11DG1924      | 1 | KSA       | Patel et al      | 2016 |
| <i>MERTK</i>   | NM_006343.2                  | c.2214del                              | p.(Cys738Trpfs*32)    | 12DG0434      | 1 | KSA       | Patel et al      | 2016 |
| <i>MERTK</i>   | NM_006343.2                  | c.325A>T                               | p.(Lys109*)           | 12DG0949      | 1 | KSA       | Patel et al      | 2016 |

|              |                                             |                              |                               |           |   |              |                     |      |
|--------------|---------------------------------------------|------------------------------|-------------------------------|-----------|---|--------------|---------------------|------|
| <i>MERTK</i> | NM_006343.2                                 | c.2214del                    | p.(Cys738Trpfs*32)            | 12DG1797  | 1 | KSA          | Patel et al         | 2016 |
| <i>MERTK</i> | NG_011607.1<br>(NM_006343.2)                | c.1604+2T>G                  | p.(=)                         | 12DG2585  | 1 | KSA          | Patel et al         | 2016 |
| <i>MERTK</i> | NM_006343.2                                 | c.2189+1G>T                  | p.(=)                         | 13DG0011  | 1 | KSA          | Patel et al         | 2016 |
| <i>MERTK</i> | NM_006343.2<br>NG_011607.1<br>(NM_006343.2) | c.2262C>G                    | p.(Tyr754*)                   | 13DG0999  | 1 | KSA          | Patel et al         | 2016 |
| <i>MERTK</i> | NM_006343.2                                 | c.2323C>T                    | p.(=)                         | -         | 1 | KSA          | Audo et al          | 2018 |
| <i>MERTK</i> | NM_006343.2                                 | c.1335_1336del **            | p.(Arg775*)                   | -         | 2 | Morocco      | Audo et al          | 2018 |
| <i>MERTK</i> | NM_006343.2                                 | c.2219C>T                    | p.(Ala446Serfs*28)            | 11DG0677  | 4 | KSA          | Patel et al         | 2018 |
| <i>MERTK</i> | NM_006343.2<br>NG_011607.1<br>(NM_006343.2) | c.2219C>T                    | p.(Ala740Val)                 | F2286     | 2 | North Africa | Audo et al          | 2018 |
| <i>MERTK</i> | NM_006343.2                                 | [c.2079+2T>G]; [c.1951C>T]   | p.[(=);(Arg651*)]             | F2600     | 1 | Lebanon      | Audo et al          | 2018 |
| <i>MERTK</i> | NM_006343.2                                 | c.1301_1302del               | p.(Glu434Alafs*40)            | F382      | 2 | North Africa | Audo et al          | 2018 |
| <i>MERTK</i> | NM_006343.2                                 | c.2214del                    | p.(Cys738Trpfs*32)            | 53        | 1 | Emirates     | Khan A O            | 2019 |
| <i>MERTK</i> | NM_006343.2                                 | c.2214del                    | p.(Cys738Trpfs*32)            | 54        | 1 | Emirates     | Khan A O            | 2019 |
| <i>MERTK</i> | NM_006343.2                                 | c.2214del                    | p.(Cys738Trpfs*32)            | 55        | 1 | Emirates     | Khan A O            | 2019 |
| <i>MERTK</i> | NM_006343.2                                 | c.2214del                    | p.(Cys738Trpfs*32)            | 56        | 1 | Emirates     | Khan A O            | 2019 |
| <i>NR2E3</i> | NM_014249.3                                 | c.932G>A                     | p.(Arg311Gln)                 | F4        | 2 | Tunisia      | Habibi et al        | 2016 |
| <i>NR2E3</i> | NM_014249.3                                 | c.932G>A                     | p.(Arg311Gln)                 | 14DG0753  | 1 | KSA          | Patel et al         | 2018 |
| <i>NR2E3</i> | NM_014249.2                                 | c.951del                     | p.(Thr318Argfs*6)             | sRP-040   | 1 | KSA          | Abu-Safieh et al    | 2013 |
| <i>NR2E3</i> | NM_014249.2                                 | c.951del                     | p.(Thr318Argfs*6)             | sRP-051   | 1 | KSA          | Abu-Safieh et al    | 2013 |
| <i>PCARE</i> | NM_001029883.2                              | [c.802C>T]; [c.2756_2768del] | p.[(Gln268*);(Lys919Thrfs*2)] | 9         | 1 | Lebanon      | Gerth-Kahlert et al | 2017 |
| <i>PCARE</i> | NM_001029883.2                              | c.1377del **                 | p.(Phe459Leufs*39)            | 12DG0758  | 2 | Iraqi        | Patel et al         | 2018 |
| <i>PCARE</i> | NM_001029883.2                              | c.1525del                    | p.(Thr509Leufs*32)            | arRP-F038 | 2 | KSA          | Abu-Safieh et al    | 2013 |
| <i>PCARE</i> | NM_001029883.2                              | c.2967del                    | p.(Val990Trpfs*45)            | 61        | 1 | Emirates     | Khan A O            | 2019 |
| <i>PDE6A</i> | NM_000440.2                                 | c.304C>A                     | p.(Arg102Ser)                 | arRP-F072 | 2 | KSA          | Abu-Safieh et al    | 2013 |
| <i>PDE6A</i> | NM_000440.2                                 | c.1358_1359del **            | p.(Ile453Serfs*8) **          | -         | 1 | Emirates     | Nair et al          | 2017 |
| <i>PDE6B</i> | NM_001145291.1                              | c.2419T>A                    | p.(Trp807Arg)                 | Us        | 2 | Tunisia      | Hmani Aifa et al    | 2009 |
| <i>PDE6B</i> | NM_001145291.1                              | c.810C>A                     | p.(Cys270*)                   | arRP-F049 | 1 | KSA          | Abu-Safieh et al    | 2013 |
| <i>PDE6B</i> | NM_000283.3                                 | c.121_125del **              | p.(Pro41Glufs*123) **         | F18       | 1 | Morocco      | Coppieters et al    | 2014 |
| <i>PDE6B</i> | NG_009839.1<br>(NM_000283.3)                | c.992+1G>A                   | p.(=)                         | 14DG1966  | 1 | KSA          | Patel et al         | 2016 |
| <i>PDE6B</i> | NM_001145291.1                              | c.1010A>G                    | p.(His337Arg)                 | F10       | 4 | Tunisia      | Habibi et al        | 2016 |

|              |                              |                              |                       |           |   |              |                  |      |
|--------------|------------------------------|------------------------------|-----------------------|-----------|---|--------------|------------------|------|
| <i>PDE6B</i> | NG_009839.1<br>(NM_000283.3) | c.992+1G>A                   | p.(=)                 | 09DG00148 | 1 | KSA          | Patel et al      | 2018 |
| <i>PROM1</i> | NM_001145848.1               | c.1530C>G                    | p.(Tyr510*)           | arRP-F054 | 2 | KSA          | Abu-Safieh et al | 2013 |
| <i>PROM1</i> | NG_011696.2<br>(NM_006017.2) | c.2130+2del **               | p.(=)                 | 09DG00585 | 1 | KSA          | Patel et al      | 2016 |
| <i>PROM1</i> | NM_006017.2                  | c.604C>G                     | p.(Arg202Gly)         | 12DG0402  | 1 | KSA          | Patel et al      | 2016 |
| <i>PROM1</i> | NM_006017.2                  | c.1354dup **                 | p.(Tyr452Leufs*13) ** | F8        | 1 | Tunisia      | Habibi et al     | 2016 |
| <i>RBP3</i>  | NM_002900.2                  | c.1162C>T                    | p.(Arg388*)           | sRP-003   | 1 | KSA          | Abu-Safieh et al | 2013 |
| <i>REEP6</i> | NM_001329556.1               | c.267G>A                     | p.(Trp89*)            | -         | 1 | North Africa | Méjécasse et al  | 2017 |
| <i>RLBP1</i> | NM_000326.5                  | c.452G>A **                  | p.(Arg151Gln) **      | KKESH-099 | 7 | KSA          | Katsanis et al   | 2001 |
| <i>RLBP1</i> | NG_008116.1<br>(NM_000326.4) | c.(525+1_526+1)_(*418_?)del* | -                     | -         | 1 | Morocco      | Humbert          | 2006 |
| <i>RLBP1</i> | NM_000326.1                  | c.446C>T                     | p.(Ser149Phe)         | arRP-F069 | 4 | KSA          | Abu-Safieh et al | 2013 |
| <i>RLBP1</i> | NG_008116.1<br>(NM_000326.4) | c.(525+1_526+1)_(*418_?)del* | -                     | MTP1554   | 1 | Morocco      | Dessalces et al  | 2013 |
| <i>RLBP1</i> | NG_008116.1<br>(NM_000326.4) | c.(525+1_526+1)_(*418_?)del* | -                     | MTP1633   | 3 | Morocco      | Dessalces et al  | 2013 |
| <i>RLBP1</i> | NG_008116.1<br>(NM_000326.4) | c.(525+1_526+1)_(*418_?)del* | -                     | MTP1789   | 1 | Morocco      | Dessalces et al  | 2013 |
| <i>RLBP1</i> | NG_008116.1<br>(NM_000326.4) | c.(525+1_526+1)_(*418_?)del* | -                     | MTP1838   | 2 | Morocco      | Dessalces et al  | 2013 |
| <i>RLBP1</i> | NG_008116.1<br>(NM_000326.4) | c.(525+1_526+1)_(*418_?)del* | -                     | MTP702    | 1 | Morocco      | Dessalces et al  | 2013 |
| <i>RLBP1</i> | NM_000326.4                  | c.452G>A                     | p.(Arg151Gln)         | sRP-015   | 1 | KSA          | Abu-Safieh et al | 2013 |
| <i>RLBP1</i> | NM_000326.4                  | c.452G>A                     | p.(Arg151Gln)         | 09DG00114 | 1 | KSA          | Patel et al      | 2016 |
| <i>RLBP1</i> | NM_000326.4                  | c.286_297del                 | p.(Phe96_Phe99del)    | 10DG0529  | 1 | KSA          | Patel et al      | 2016 |
| <i>RP1</i>   | NM_006269.1                  | c.662del **                  | p.(Ala221Glyfs*43) ** | DGU-F1    | 3 | KSA          | Aldahmesh et al  | 2009 |
| <i>RP1</i>   | NM_006269.1                  | c.606C>A                     | p.(Asp202Glu)         | DGU-F2    | 3 | KSA          | Aldahmesh et al  | 2009 |
| <i>RP1</i>   | NM_006269.1                  | c.3428del **                 | p.(Asn1143Ilefs*25)   | arRP-DF01 | 3 | KSA          | Al Rashed et al  | 2012 |
| <i>RP1</i>   | NM_006269.1                  | c.3677_3678dup **            | p.(Glu1227Metfs*29)   | arRP-F101 | 4 | KSA          | Al Rashed et al  | 2012 |
| <i>RP1</i>   | NM_006269.1                  | c.4552A>T                    | p.(Lys1518*)          | arRP-F28  | 4 | KSA          | Al Rashed et al  | 2012 |
| <i>RP1</i>   | NM_006269.1                  | c.3428del                    | p.(Asn1143Ilefs*25)   | arRP-F43  | 4 | KSA          | Al Rashed et al  | 2012 |
| <i>RP1</i>   | NM_006269.1                  | c.3428del                    | p.(Asn1143Ilefs*25)   | arRP-F84  | 4 | KSA          | Al Rashed et al  | 2012 |
| <i>RP1</i>   | NM_006269.1                  | c.3396G>A                    | p.(Trp1132*) **       | sRP-19    | 1 | KSA          | Al Rashed et al  | 2012 |

|               |                              |                                                                      |                                                                           |           |   |          |                  |      |
|---------------|------------------------------|----------------------------------------------------------------------|---------------------------------------------------------------------------|-----------|---|----------|------------------|------|
| <i>RP1</i>    | NM_006269.1                  | c.4242_4243del                                                       | p.(His1414Glnfs*5)                                                        | arRP-F111 | 2 | KSA      | Abu-Safieh et al | 2013 |
| <i>RP1</i>    | NM_006269.1                  | c.3428del                                                            | p.(Asn1143Ilefs*25)                                                       | arRP-F114 | 2 | KSA      | Abu-Safieh et al | 2013 |
| <i>RP1</i>    | NM_006269.1                  | c.4242_4243del                                                       | p.(His1414Glnfs*5)                                                        | arRP-F116 | 3 | KSA      | Abu-Safieh et al | 2013 |
| <i>RP1</i>    | NM_006269.1                  | c.5008G>A                                                            | p.(Ala1670Thr)                                                            | arRP-FD02 | 5 | KSA      | Abu-Safieh et al | 2013 |
| <i>RP1</i>    | NM_006269.1                  | c.606C>A                                                             | p.(Asp202Glu)                                                             | sRP-047   | 1 | KSA      | Abu-Safieh et al | 2013 |
| <i>RP1</i>    | NM_006269.1                  | c.1012C>T                                                            | p.(Arg338*)                                                               | sRP-084   | 1 | KSA      | Abu-Safieh et al | 2013 |
| <i>RP1</i>    | NM_006269.1                  | c.3428del                                                            | p.(Asn1143Ilefs*25)                                                       | 09DG00881 | 1 | KSA      | Patel et al      | 2016 |
| <i>RP1</i>    | NM_006269.1                  | c.3428del                                                            | p.(Asn1143Ilefs*25)                                                       | 09DG00920 | 1 | KSA      | Patel et al      | 2016 |
| <i>RP1</i>    | NM_006269.1                  | c.3428del                                                            | p.(Asn1143Ilefs*25)                                                       | 09DG01025 | 1 | KSA      | Patel et al      | 2016 |
| <i>RP1</i>    | NM_006269.1                  | c.662del                                                             | p.(Ala221Glyfs*43)                                                        | 11DG2524  | 1 | KSA      | Patel et al      | 2016 |
| <i>RP1</i>    | NM_006269.1                  | c.1719_1723del                                                       | p.(Ser574Cysfs*7)                                                         | 12DG1405  | 1 | KSA      | Patel et al      | 2016 |
| <i>RP1</i>    | NM_006269.1                  | c.606C>A                                                             | p.(Asp202Glu)                                                             | 13DG1132  | 1 | KSA      | Patel et al      | 2016 |
| <i>RP1</i>    | NM_006269.1                  | c.3396G>A                                                            | p.(Trp1132*) **                                                           | 15DG0607  | 1 | KSA      | Patel et al      | 2018 |
| <i>RP1</i>    | NM_006269.1                  | c.3396G>A                                                            | p.(Trp1132*) **                                                           | 17DG0901  | 3 | KSA      | Patel et al      | 2018 |
| <i>RP1</i>    | NM_006269.1                  | c.3544_3545insAGAAAAGCTG                                             | p.(Ala1182Glufs*20) **                                                    | Fam A     | 2 | KSA      | Albarry et al    | 2019 |
| <i>RP1L1</i>  | NM_178857.5                  | c.5959C>T                                                            | p.(Gln1987*)                                                              | 12DG2561  | 1 | KSA      | Patel et al      | 2016 |
| <i>RP1L1</i>  | NM_178857.5                  | c.3955_3956insGGACTAAAGTAATAGAAAGGGCTGCAA<br>GAAGAGAGGGTGCAAGTTAGAGG | p.(Glu1318_Ala1319insGlyThrLysValIleGluGlyLeuGlnGluGluArgValGlnLeuGlu) ** | Fam B     | 1 | KSA      | Albarry et al    | 2019 |
| <i>RPE65</i>  | NM_000329.2                  | c.310G>C                                                             | p.(Gly104Arg)                                                             | arRP-F075 | 4 | KSA      | Abu-Safieh et al | 2013 |
| <i>RPE65</i>  | NM_000329.2                  | c.131G>A                                                             | p.(Arg44Gln)                                                              | 09DG00042 | 1 | KSA      | Patel et al      | 2016 |
| <i>RPE65</i>  | NM_000329.2                  | c.1366del                                                            | p.(Glu456Lysfs*30)                                                        | 11DG2533  | 1 | KSA      | Patel et al      | 2016 |
| <i>RPE65</i>  | NM_000329.2                  | c.544C>T                                                             | p.(His182Tyr)                                                             | F5        | 3 | Tunisia  | Habibi et al     | 2016 |
| <i>RPE65</i>  | NG_008472.2<br>(NM_000329.2) | c.[1129-2A>G]                                                        | p.(=)                                                                     | F6        | 2 | Tunisia  | Habibi et al     | 2016 |
| <i>RPE65</i>  | NM_000329.2                  | [c.271C>T];[c.515T>A]                                                | p.[(Arg91Trp);(Val172Asp)]                                                | F7        | 2 | Tunisia  | Habibi et al     | 2016 |
| <i>RPE65</i>  | NM_000329.2                  | c.993G>A                                                             | p.(Trp331*)                                                               | 63        | 1 | Emirates | Khan A O         | 2019 |
| <i>RPE65</i>  | NG_008472.2<br>(NM_000329.2) | c.(?-1)_(1128+1_1129-1)del                                           | -                                                                         | 64        | 1 | Emirates | Khan A O         | 2019 |
| <i>SPATA7</i> | NM_018418.4                  | c.288T>A                                                             | p.(Cys96*)                                                                | 11DG1400  | 1 | KSA      | Patel et al      | 2016 |
| <i>TULP1</i>  | NM_003322.3                  | c.901C>T                                                             | p.(Gln301*)                                                               | arRP-F002 | 8 | KSA      | Abu-Safieh et al | 2013 |
| <i>TULP1</i>  | NM_003322.3                  | c.901C>T                                                             | p.(Gln301*)                                                               | arRP-F003 | 2 | KSA      | Abu-Safieh et al | 2013 |
| <i>TULP1</i>  | NM_003322.3                  | c.901C>T                                                             | p.(Gln301*)                                                               | arRP-F013 | 3 | KSA      | Abu-Safieh et al | 2013 |

|               |                              |                           |                            |           |   |                   |                  |      |
|---------------|------------------------------|---------------------------|----------------------------|-----------|---|-------------------|------------------|------|
| <i>TULP1</i>  | NM_003322.3                  | c.901C>T                  | p.(Gln301*)                | arRP-F015 | 2 | KSA               | Abu-Safieh et al | 2013 |
| <i>TULP1</i>  | NM_003322.3                  | c.901C>T                  | p.(Gln301*)                | arRP-F020 | 3 | KSA               | Abu-Safieh et al | 2013 |
| <i>TULP1</i>  | NM_003322.3                  | c.901C>T                  | p.(Gln301*)                | arRP-F052 | 2 | KSA               | Abu-Safieh et al | 2013 |
| <i>TULP1</i>  | NM_003322.3                  | c.901C>T                  | p.(Gln301*)                | arRP-F106 | 3 | KSA               | Abu-Safieh et al | 2013 |
| <i>TULP1</i>  | NM_003322.3                  | c.901C>T                  | p.(Gln301*)                | arRP-F121 | 3 | KSA               | Abu-Safieh et al | 2013 |
| <i>TULP1</i>  | NM_003322.3                  | c.901C>T                  | p.(Gln301*)                | sRP-010   | 1 | KSA               | Abu-Safieh et al | 2013 |
| <i>TULP1</i>  | NM_003322.3                  | c.901C>T                  | p.(Gln301*)                | sRP-021   | 1 | KSA               | Abu-Safieh et al | 2013 |
| <i>TULP1</i>  | NM_003322.3                  | c.901C>T                  | (p.Gln301*)                | -         | 1 | Arabian Peninsula | Khan et al       | 2015 |
| <i>TULP1</i>  | NM_003322.4                  | c.901C>T                  | p.(Gln301*)                | 09DG00491 | 1 | KSA               | Patel et al      | 2016 |
| <i>TULP1</i>  | NM_003322.4                  | c.901C>T                  | p.(Gln301*)                | 09DG00492 | 1 | KSA               | Patel et al      | 2016 |
| <i>TULP1</i>  | NM_003322.3                  | c.901C>T                  | p.(Gln301*)                | 11DG0480  | 1 | KSA               | Patel et al      | 2016 |
| <i>TULP1</i>  | NG_009077.1<br>(NM_003322.4) | c.1495+1G>A               | p.(=)                      | 11DG1963  | 1 | KSA               | Patel et al      | 2016 |
| <i>TULP1</i>  | NM_003322.3                  | c.901C>T                  | p.(Gln301*)                | 12DG0751  | 1 | KSA               | Patel et al      | 2016 |
| <i>TULP1</i>  | NG_009077.1<br>(NM_003322.4) | c.1256G>A                 | p.(Arg419Gln)              | 12DG1758  | 1 | KSA               | Patel et al      | 2016 |
| <i>TULP1</i>  | NM_003322.3                  | c.901C>T                  | p.(Gln301*)                | 12DG2327  | 1 | KSA               | Patel et al      | 2016 |
| <i>TULP1</i>  | NM_003322.3                  | c.901C>T                  | p.(Gln301*)                | 13DG2124  | 1 | KSA               | Patel et al      | 2016 |
| <i>TULP1</i>  | NM_003322.3                  | c.901C>T                  | p.(Gln301*)                | 11DG1028  | 3 | KSA               | Patel et al      | 2018 |
| <i>TULP1</i>  | NM_003322.3                  | c.901C>T                  | p.(Gln301*)                | 11DG1052  | 1 | KSA               | Patel et al      | 2018 |
| <i>USH2A</i>  | NM_206933.2                  | c.842C>A                  | p.(Thr281Lys)              | 11DG1451  | 3 | KSA               | Patel et al      | 2018 |
| <i>USH2A</i>  | NM_206933.2                  | [c.2276G>T];[c.5776+1G>A] | p.[(Cys759Phe);p.(=)]      | 11DG1558  | 1 | KSA               | Patel et al      | 2016 |
| <i>USH2A</i>  | NG_009497.2<br>(NM_206933.2) | [c.1923T>A];[c.14294T>C]  | p.[(Cys641*);(Val4765Ala)] | 13DG0370  | 2 | Jordan            | Patel et al      | 2018 |
| <i>USH2A</i>  | NM_206933.2                  | c.4033G>C                 | p.(Ala1345Pro)             | 14DG0544  | 3 | KSA               | Patel et al      | 2018 |
| <i>ZNF408</i> | NG_052967.1<br>(NM_024741.3) | c.653-1G>T                | p.(=)                      | -         | 3 | Tunisia           | Habibi et al     | 2017 |

**Supplementary Table 2:** Identified variants in Arab individuals with dominant and x-linked rod cone dystrophy.

| Gene            | Ref_Seq     | DNA change   | Protein change      | Status | Family/sample ID | N | Country  | Authors/Year       | Inheritance |
|-----------------|-------------|--------------|---------------------|--------|------------------|---|----------|--------------------|-------------|
| <i>CRX</i>      | NM_000554.4 | c.695del     | p.(Pro232Argfs*139) | Htz    | 09DG00180        | 1 | KSA      | Patel et al- 2016  | adRCD       |
| <i>CRX</i>      | NM_000554.4 | c.274G>A     | p.(Ala92Thr)        | Htz    | 09DG00976        | 1 | KSA      | Patel et al- 2016  | adRCD       |
| <i>CRX</i>      | NM_000554.4 | c.425A>G     | p.(Tyr142Cys)       | Htz    | 11DG2472         | 1 | KSA      | Patel et al- 2016  | adRCD       |
| <i>CRX</i>      | NM_000554.4 | c.425A>G     | p.(Tyr142Cys)       | Htz    | 12DG0648         | 1 | KSA      | Patel et al- 2016  | adRCD       |
| <i>PRPF8</i>    | 4-          | c.6928A>G    | p.(Arg2310Gly)      | Htz    | 62               | 1 | Emirates | Khan AO- 2019      | adRCD       |
| <i>SNRNP200</i> | NM_014014.4 | c.6308A>G    | p.(Asn2103Ser)      | Htz    | 11DG0274         | 1 | KSA      | Patel et al- 2016  | adRCD       |
| <i>SNRNP200</i> | NM_014014.4 | c.2593G>A    | p.(Gly865Ser)       | Htz    | 12DG0322         | 1 | KSA      | Patel et al- 2016  | adRCD       |
| <i>RP2</i>      | NM_006915.2 | c.2T>C       | -                   | Hemi   | 12DG2227         | 1 | KSA      | Patel et al- 2016  | xLRCD       |
| <i>RP2</i>      | NM_006915.2 | c.352C>T     | p.(Arg118Cys)       | Hmz    | 10DG0873         | 1 | KSA      | Patel et al- 2016  | xLRCD       |
| <i>RPGR</i>     |             | ORF15+588G>A | p.(Ala196Thr)       | Hemi   | -                | - | Jordan   | Haddad et al- 2016 | xLRCD       |

Ref\_Seq: Reference Sequence, N: Number of sequenced individuals, Htz: heterozygous, KSA: kingdom of Saudi Arabia, adRCD: autosomal dominant rod-cone dystrophy, Hemi: hemizygous, xLRCD: xLinked rod-cone dystrophy.



Supplementary Table 3: MeSH terms used to systematically screen all papers dealing with the genetics of rod cone dystrophy in the Arab Countries

| Search   | MeSH Terms                                                                                                                                                                                                                                                                                                                                                                                                                                                                                                                                                                                                                                                                                                                                                                                                                                                                                                                                                                                                                                                                                                                                                                                                                                                                                                              |
|----------|-------------------------------------------------------------------------------------------------------------------------------------------------------------------------------------------------------------------------------------------------------------------------------------------------------------------------------------------------------------------------------------------------------------------------------------------------------------------------------------------------------------------------------------------------------------------------------------------------------------------------------------------------------------------------------------------------------------------------------------------------------------------------------------------------------------------------------------------------------------------------------------------------------------------------------------------------------------------------------------------------------------------------------------------------------------------------------------------------------------------------------------------------------------------------------------------------------------------------------------------------------------------------------------------------------------------------|
| Search 1 | rod cone dystrophy and (africa, northern[mesh] OR algeria[mesh] OR egypt[mesh] OR libya[mesh] OR morocco[mesh] OR tunisia[mesh] OR south sudan[mesh] OR sudan[mesh] OR middle east[mesh:noexp] OR bahrain[mesh] OR iraq[mesh] OR jordan[mesh] OR kuwait[mesh] OR lebanon[mesh] OR oman[mesh] OR qatar[mesh] OR saudi arabia[mesh] OR syria[mesh] OR united arab emirates[mesh] OR yemen[mesh] OR algeria*[tw] OR somalia[mesh] OR mauritania[mesh] OR djibouti[mesh] OR arabs[mesh] OR comoros[mesh] OR bahrain*[tw] OR egypt*[tw] OR iraq*[tw] OR jordan*[tw] OR kuwait*[tw] OR lebanon[tw] OR lebanese[tw] OR libanaise[tw] OR yemen*[tw] OR aden[tw] OR sanaa[tw] OR UAE[tw] OR emirat*[tw] OR abu-dhabi[tw] OR dubai[tw] OR libya*[tw] OR morocco[tw] OR moroccan*[tw] OR oman*[tw] OR muscat[tw] OR palestine*[tw] OR gaza[tw] OR west-bank[tw] OR qatar*[tw] OR katar*[tw] OR quatar*[tw] OR saudi*[tw] OR KSA[tw] OR syria*[tw] OR tunis*[tw] OR ifni[tw] OR trucional state*[tw] OR comoros*[tw] OR north africa*[tw] OR northern Africa*[tw] OR sudan*[tw] OR MENA[tw] OR EMRO[tw] OR middle east*[tw] OR east mediterranean[tw] OR eastern mediterranean[tw] OR near east*[tw] OR orient[tw] OR arabs[tw] OR arab[tw] OR arabia[tw] OR somali*[tw] OR mauritania*[tw] OR djibouti*[tw] OR levant[tw])         |
| Search 2 | retinitis pigmentosa and (africa, northern[mesh] OR algeria[mesh] OR egypt[mesh] OR libya[mesh] OR morocco[mesh] OR tunisia[mesh] OR south sudan[mesh] OR sudan[mesh] OR middle east[mesh:noexp] OR bahrain[mesh] OR iraq[mesh] OR jordan[mesh] OR kuwait[mesh] OR lebanon[mesh] OR oman[mesh] OR qatar[mesh] OR saudi arabia[mesh] OR syria[mesh] OR united arab emirates[mesh] OR yemen[mesh] OR algeria*[tw] OR somalia[mesh] OR mauritania[mesh] OR djibouti[mesh] OR arabs[mesh] OR comoros[mesh] OR bahrain*[tw] OR egypt*[tw] OR iraq*[tw] OR jordan*[tw] OR kuwait*[tw] OR lebanon[tw] OR lebanese[tw] OR libanaise[tw] OR yemen*[tw] OR aden[tw] OR sanaa[tw] OR UAE[tw] OR emirat*[tw] OR abu-dhabi[tw] OR dubai[tw] OR libya*[tw] OR morocco[tw] OR moroccan*[tw] OR oman*[tw] OR muscat[tw] OR palestine*[tw] OR gaza[tw] OR west-bank[tw] OR qatar*[tw] OR katar*[tw] OR quatar*[tw] OR saudi*[tw] OR KSA[tw] OR syria*[tw] OR tunis*[tw] OR ifni[tw] OR trucional state*[tw] OR comoros*[tw] OR north africa*[tw] OR northern Africa*[tw] OR sudan*[tw] OR MENA[tw] OR EMRO[tw] OR middle east*[tw] OR east mediterranean[tw] OR eastern mediterranean[tw] OR near east*[tw] OR orient[tw] OR arabs[tw] OR arab[tw] OR arabia[tw] OR somali*[tw] OR mauritania*[tw] OR djibouti*[tw] OR levant[tw])       |
| Search 3 | inherited retinal diseases and (africa, northern[mesh] OR algeria[mesh] OR egypt[mesh] OR libya[mesh] OR morocco[mesh] OR tunisia[mesh] OR south sudan[mesh] OR sudan[mesh] OR middle east[mesh:noexp] OR bahrain[mesh] OR iraq[mesh] OR jordan[mesh] OR kuwait[mesh] OR lebanon[mesh] OR oman[mesh] OR qatar[mesh] OR saudi arabia[mesh] OR syria[mesh] OR united arab emirates[mesh] OR yemen[mesh] OR algeria*[tw] OR somalia[mesh] OR mauritania[mesh] OR djibouti[mesh] OR arabs[mesh] OR comoros[mesh] OR bahrain*[tw] OR egypt*[tw] OR iraq*[tw] OR jordan*[tw] OR kuwait*[tw] OR lebanon[tw] OR lebanese[tw] OR libanaise[tw] OR yemen*[tw] OR aden[tw] OR sanaa[tw] OR UAE[tw] OR emirat*[tw] OR abu-dhabi[tw] OR dubai[tw] OR libya*[tw] OR morocco[tw] OR moroccan*[tw] OR oman*[tw] OR muscat[tw] OR palestine*[tw] OR gaza[tw] OR west-bank[tw] OR qatar*[tw] OR katar*[tw] OR quatar*[tw] OR saudi*[tw] OR KSA[tw] OR syria*[tw] OR tunis*[tw] OR ifni[tw] OR trucional state*[tw] OR comoros*[tw] OR north africa*[tw] OR northern Africa*[tw] OR sudan*[tw] OR MENA[tw] OR EMRO[tw] OR middle east*[tw] OR east mediterranean[tw] OR eastern mediterranean[tw] OR near east*[tw] OR orient[tw] OR arabs[tw] OR arab[tw] OR arabia[tw] OR somali*[tw] OR mauritania*[tw] OR djibouti*[tw] OR levant[tw]) |
| Search 4 | retinal dystrophies and (africa, northern[mesh] OR algeria[mesh] OR egypt[mesh] OR libya[mesh] OR morocco[mesh] OR tunisia[mesh] OR south sudan[mesh] OR sudan[mesh] OR middle east[mesh:noexp] OR bahrain[mesh] OR iraq[mesh] OR jordan[mesh] OR kuwait[mesh] OR lebanon[mesh] OR oman[mesh] OR qatar[mesh] OR saudi arabia[mesh] OR syria[mesh] OR united arab emirates[mesh] OR yemen[mesh] OR algeria*[tw] OR somalia[mesh] OR mauritania[mesh] OR djibouti[mesh] OR arabs[mesh] OR comoros[mesh] OR bahrain*[tw] OR egypt*[tw] OR iraq*[tw] OR jordan*[tw] OR kuwait*[tw] OR lebanon[tw] OR lebanese[tw] OR libanaise[tw] OR yemen*[tw] OR aden[tw] OR sanaa[tw] OR UAE[tw] OR emirat*[tw] OR abu-dhabi[tw] OR dubai[tw] OR libya*[tw] OR morocco[tw] OR moroccan*[tw] OR oman*[tw] OR muscat[tw] OR palestine*[tw] OR gaza[tw] OR west-bank[tw] OR qatar*[tw] OR katar*[tw] OR quatar*[tw] OR saudi*[tw] OR KSA[tw] OR syria*[tw] OR tunis*[tw] OR ifni[tw] OR trucional state*[tw] OR comoros*[tw] OR north africa*[tw] OR northern Africa*[tw] OR sudan*[tw] OR MENA[tw] OR EMRO[tw] OR middle east*[tw] OR east mediterranean[tw] OR eastern mediterranean[tw] OR near east*[tw] OR orient[tw] OR arabs[tw] OR arab[tw] OR arabia[tw] OR somali*[tw] OR mauritania*[tw] OR djibouti*[tw] OR levant[tw])        |

|          |                                                                                                                                                                                                                                                                                                                                                                                                                                                                                                                                                                                                                                                                                                                                                                                                                                                                                                                                                                                                                                                                                                                                                                                                                                                                                                                                                                                                                                              |
|----------|----------------------------------------------------------------------------------------------------------------------------------------------------------------------------------------------------------------------------------------------------------------------------------------------------------------------------------------------------------------------------------------------------------------------------------------------------------------------------------------------------------------------------------------------------------------------------------------------------------------------------------------------------------------------------------------------------------------------------------------------------------------------------------------------------------------------------------------------------------------------------------------------------------------------------------------------------------------------------------------------------------------------------------------------------------------------------------------------------------------------------------------------------------------------------------------------------------------------------------------------------------------------------------------------------------------------------------------------------------------------------------------------------------------------------------------------|
| Search 5 | rod cone dystrophy or retinitis pigmentosa or inherited retinal diseases or retinal dystrophies or inherited retinal disease or retinal dystrophy) and (africa, northern[mesh] OR algeria[mesh] OR egypt[mesh] OR libya[mesh] OR morocco[mesh] OR tunisia[mesh] OR south sudan[mesh] OR sudan[mesh] OR middle east[mesh:noexp] OR bahrain[mesh] OR iraq[mesh] OR jordan[mesh] OR kuwait[mesh] OR lebanon[mesh] OR oman[mesh] OR qatar[mesh] OR saudi arabia[mesh] OR syria[mesh] OR united arab emirates[mesh] OR yemen[mesh] OR algeria*[tw] OR somalia[mesh] OR mauritania[mesh] OR djibouti[mesh] OR arabs[mesh] OR comoros[mesh] OR bahrain*[tw] OR egypt*[tw] OR iraq*[tw] OR jordan*[tw] OR kuwait*[tw] OR lebanon[tw] OR lebanese[tw] OR libanaise[tw] OR yemen*[tw] OR aden[tw] OR sanaa[tw] OR UAE[tw] OR emirat*[tw] OR abu-dhabi[tw] OR dubai[tw] OR libya*[tw] OR morocco[tw] OR moroccan*[tw] OR oman*[tw] OR muscat[tw] OR palestin*[tw] OR gaza[tw] OR west-bank[tw] OR qatar*[tw] OR katar*[tw] OR quatar*[tw] OR saudi*[tw] OR KSA[tw] OR syria*[tw] OR tunis*[tw] OR ifni[tw] OR trucial state*[tw] OR comoros*[tw] OR north africa*[tw] OR northern Africa*[tw] OR sudan*[tw] OR MENA[tw] OR EMRO[tw] OR middle east*[tw] OR east mediterranean[tw] OR eastern mediterranean[tw] OR near east*[tw] OR orient[tw] OR arabs[tw] OR arab[tw] OR arabia[tw] OR somali*[tw] OR mauritania*[tw] OR djibouti*[tw] OR levant[tw]) |
| Search 6 | retinal dystrophy and (africa, northern[mesh] OR algeria[mesh] OR egypt[mesh] OR libya[mesh] OR morocco[mesh] OR tunisia[mesh] OR south sudan[mesh] OR sudan[mesh] OR middle east[mesh:noexp] OR bahrain[mesh] OR iraq[mesh] OR jordan[mesh] OR kuwait[mesh] OR lebanon[mesh] OR oman[mesh] OR qatar[mesh] OR saudi arabia[mesh] OR syria[mesh] OR united arab emirates[mesh] OR yemen[mesh] OR algeria*[tw] OR somalia[mesh] OR mauritania[mesh] OR djibouti[mesh] OR arabs[mesh] OR comoros[mesh] OR bahrain*[tw] OR egypt*[tw] OR iraq*[tw] OR jordan*[tw] OR kuwait*[tw] OR lebanon[tw] OR lebanese[tw] OR libanaise[tw] OR yemen*[tw] OR aden[tw] OR sanaa[tw] OR UAE[tw] OR emirat*[tw] OR abu-dhabi[tw] OR dubai[tw] OR libya*[tw] OR morocco[tw] OR moroccan*[tw] OR oman*[tw] OR muscat[tw] OR palestin*[tw] OR gaza[tw] OR west-bank[tw] OR qatar*[tw] OR katar*[tw] OR quatar*[tw] OR saudi*[tw] OR KSA[tw] OR syria*[tw] OR tunis*[tw] OR ifni[tw] OR trucial state*[tw] OR comoros*[tw] OR north africa*[tw] OR northern Africa*[tw] OR sudan*[tw] OR MENA[tw] OR EMRO[tw] OR middle east*[tw] OR east mediterranean[tw] OR eastern mediterranean[tw] OR near east*[tw] OR orient[tw] OR arabs[tw] OR arab[tw] OR arabia[tw] OR somali*[tw] OR mauritania*[tw] OR djibouti*[tw] OR levant[tw])                                                                                                                                  |

Supplementary Table 4.

| Gene                                                                                                                          | Description                                                                                                                                                                                                                                                                                                                                                                                                                                                                                                                                                                                                                                                                                                                                                                                                                                                           |
|-------------------------------------------------------------------------------------------------------------------------------|-----------------------------------------------------------------------------------------------------------------------------------------------------------------------------------------------------------------------------------------------------------------------------------------------------------------------------------------------------------------------------------------------------------------------------------------------------------------------------------------------------------------------------------------------------------------------------------------------------------------------------------------------------------------------------------------------------------------------------------------------------------------------------------------------------------------------------------------------------------------------|
| <i>Calcium binding protein 4 (CABP4)</i>                                                                                      | Three Saudi individuals carrying a homozygous frameshift insertion were reported until today. <i>CABP4</i> is known for its association with recessive Leber Congenital Amaurosis (20157620) and Congenital stationary night blindness (16960802).                                                                                                                                                                                                                                                                                                                                                                                                                                                                                                                                                                                                                    |
| <i>Cadherin-Related Family, Member 1 (CDHR1)</i>                                                                              | Despite its known association with Cone and Cone-rod dystrophy, Patel et al, reported mutations among three Saudi cases with arRCD c.476C>A; p.Ala159Glu, c.1536T>A; p.Tyr512* and c.709del; p.Glu237Argfs*30 in (26355662) and in a Palestinian one; c.338del; p.(Gly113Alafs*2) (30054919) .                                                                                                                                                                                                                                                                                                                                                                                                                                                                                                                                                                        |
| <i>Cyclic Nucleotide-Gated Channel, Alpha-3 (CNGA3) and Wd Repeat-Containing Protein 19 (WDR19)</i>                           | Furthermore, Patel et al reported two homozygous missense in c.2050G>A; p.Gly684Arg and c.2777G>T; p.Ser926Ile in <i>CNGA3</i> and <i>WDR19</i> respectively, the two genes previously shown to be associated with syndromic forms of retinal dystrophies (26355662).                                                                                                                                                                                                                                                                                                                                                                                                                                                                                                                                                                                                 |
| <i>Endoplasmic Reticulum Membrane Protein Complex, Subunit 1 (EMC1), G-Protein Coupled Receptor 125 (GPR125) and KIAA1549</i> | Abu-Safieh et al in 2013 identified homozygous mutations; c.430G>A; p.Ala144Thr, c.2504C>G;p.Ser835Cys, c.2399_2400insAA: p.(Glu801Metfs*9) in novel genes, not previously known for their association with non-syndromic arRCD such as <i>EMC1</i> , <i>GPR125</i> and <i>KIAA1549</i> genes respectively among (23105016). Direct sequencing of patients from the replication cohort revealed a patient who is homozygous for the same mutation in <i>EMC1</i> but not <i>GPR125</i> or <i>KIAA1549</i> . It is of importance to mention that the three previously mentioned genes are found exclusively mutated in Arabic populations.                                                                                                                                                                                                                             |
| <i>Potassium channel subfamily V member 2 (KCNV2)</i>                                                                         | One nonsense mutation; c.427G>T; p.(Glu143*) in <i>KCNV2</i> was recurrently identified in 6 Saudi individuals with arRCD (26355662, 23105016) despite being a gene that is known to cause cone dystrophy (16909397).                                                                                                                                                                                                                                                                                                                                                                                                                                                                                                                                                                                                                                                 |
| <i>Leber Congenital Amaurosis 5 (LCA5)</i>                                                                                    | Using WES, Abu Safieh et al in 2013 reported a homozygous frameshift deletion in <i>LCA5</i> : c.256del; p.(Gln86Argfs*25) carried by a Saudi Arabian individual (23105016). Although <i>LCA5</i> is known for its association with leber congenital amaurosis, Abu Safieh et al reported it with arRCD.                                                                                                                                                                                                                                                                                                                                                                                                                                                                                                                                                              |
| <i>Otogelin Like (OTOGL)</i>                                                                                                  | In an Algerian family with arRCD, Astuti et al recently identified Segregating compound heterozygous variants c.2318C>T and c.2833C>T; p.(Pro773Leu) and p.(Arg945*) were identified in <i>Otogelin Like (OTOGL)</i> (29320387). Segregation was done in all family members. Of importance, this variation occurs was found homozygous in two supposed health persons from ExAC database (29320387), an observation that decreases the plausibility of being considered as pathogenic. In additionm, pathogenic mutations in <i>OTOGL</i> are associated with sensorineural hearing loss. Since the authors admit that homozygosity mapping indicates two homozygous regions in which no currently known IRD-associated genes appear (29320387), we think that all of the above does not support <i>OTOGL</i> as RCD gene and favors the implication of a novel gene. |

|                                                                            |                                                                                                                                                                                                                                                                                                                                                                              |
|----------------------------------------------------------------------------|------------------------------------------------------------------------------------------------------------------------------------------------------------------------------------------------------------------------------------------------------------------------------------------------------------------------------------------------------------------------------|
| <i>Peripherin 2 (PRPH2)</i>                                                | Although admitted by Abu Safieh et al, that <i>PRPH2</i> is not known for its association with arRCD, the authors reported a Saudi Arabian simplex case having a homozygous missense in this gene; c.1013A>G; p.(Asp338Gly) (23105016).                                                                                                                                      |
| <i>Retinol Dehydrogenase 12 (RDH12)</i>                                    | Three recurrent missense mutations; c.139G>A; p.(Ala47Thr), c.226G>C; p.(Gly76Arg), c.464C>T; p.Thr155Ile17 were identified in 10 individuals from three different countries (KSA, Morocco and Algeria) (24625443, 26355662, 30054919). Although known for causing dominant RCD, the autosomal recessive cases of RDH12 are seen with leber congenital amaurosis (15322982). |
| <i>Retinitis Pigmentosa Gtpase Regulator-Interacting Protein (RPGRIP1)</i> | Similar to <i>RLBP1</i> , a nonsense mutation; c.154C>T, p.(Arg52*) in <i>RPGRIP1</i> was found also associated with RPA in an individual from Saudi Arabia using autozygome guided sequencing (23105016).                                                                                                                                                                   |

**Supplementary Table 5:** List of individuals with rod cone dystrophy reported in more than one study.

| <i>Gene</i>   | Ref_Seq        | Change at DNA level            | Change at Protein level         | Status | Family/ sample ID | N | Origin            | Authors          | Year |
|---------------|----------------|--------------------------------|---------------------------------|--------|-------------------|---|-------------------|------------------|------|
| <i>CYP4V2</i> |                | c.1348C>T                      | p.Gln450*                       | Hm     | -                 | 2 | Middle East       | Lin et al        | 2005 |
| <i>MERTK</i>  |                | 9 kb deletion removing exon 8. | -                               | Hm     | A                 | 2 | Middle Eastern    | Mackay et al     | 2010 |
| <i>RP1</i>    | NM_006269.1    | c.4552A>T                      | p. (Lys1518*)                   | Hm     | arPR-F028         | 4 | KSA               | Abu-Safieh et al | 2013 |
| <i>RP1</i>    | NM_006269.1    | c.3428 delA                    | p.(Asn1143Ilefs*25)             | Hm     | arRP-F043         | 4 | KSA               | Abu-Safieh et al | 2013 |
| <i>RP1</i>    | NM_006269.1    | c.3428 delA                    | p.(Asn1143Ilefs*25)             | Hm     | arRP-F084         | 4 | KSA               | Abu-Safieh et al | 2013 |
| <i>RP1</i>    | NM_006269.1    | c.3677_3678dupA                | p.(Glu1227Metfs*29)             | Hm     | arRP-F101         | 4 | KSA               | Abu-Safieh et al | 2013 |
| <i>RP1</i>    | NM_006269.1    | c.662delC                      | p.(Ala221Glyfs*20)              | Hm     | DGU-F1            | 3 | KSA               | Abu-Safieh et al | 2013 |
| <i>RP1</i>    | NM_006269.1    | c.3396G>A                      | p.(Trp1131*)                    | Hm     | sRP-019           | 1 | KSA               | Abu-Safieh et al | 2013 |
| <i>MERTK</i>  | NM_006343.2    | c.1335_1336del                 | p.(Ala446Serfs*28)              | Hm     | DGU-F16           | 3 | KSA               | Abu-Safieh et al | 2013 |
| <i>CRB1</i>   | NM_201253.2    | c.3495T>G                      | p.(Cys1165Trp)                  | Hm     | DGU-F11           | 4 | KSA               | Abu-Safieh et al | 2013 |
| <i>MKKS</i>   | NM_018848.3    | c.295T>C                       | p.(Cys99Arg)                    | hmz    | 11DG1165          | 1 | ksa               | Patel et al      | 2016 |
| <i>GPR179</i> | NM_001004334.3 | c.349G>A                       | p.(Asp117Asn)                   | Hm     | 14DG0286          | 1 | KSA               | Patel et al      | 2016 |
| <i>CRX</i>    | NM_000554.4    | c.695del                       | p.(Pro232Argfs*139)             | N.A    | 09DG00180         | 1 | KSA               | Patel et al      | 2016 |
| <i>CRX</i>    | NM_000554.4    | c.274G>A                       | p.(Ala92Thr)                    | N.A    | 09DG00976         | 1 | KSA               | Patel et al      | 2016 |
| <i>CRX</i>    | NM_000554.4    | c.425A>G                       | p.(Tyr142Cys)                   | N.A    | 11DG2472          | 1 | KSA               | Patel et al      | 2016 |
| <i>CRX</i>    | NM_000554.4    | c.425A>G                       | p.(Tyr142Cys)                   | N.A    | 12DG0648          | 1 | KSA               | Patel et al      | 2016 |
| <i>BBS4</i>   | NM_033028.4    | c.1311_1312insT & c.262del     | p.(Lys438*) & p.(Glu88Asnfs*54) | C Ht   | 12DG0398          | 1 | KSA               | Patel et al      | 2016 |
| <i>MERTK</i>  | NM_006343.2    | c.2262C>G                      | p.(Tyr754*)                     | Hm     | -                 | 1 | KSA               | Audo et al       | 2018 |
| <i>MERTK</i>  | NM_006343.2    | c.325A>T                       | p.(Lys109*)                     | Hm     | -                 | 1 | KSA               | Audo et al       | 2018 |
| <i>MERTK</i>  | NM_006343.2    | c.1335_1336del                 | p.(Ala446Serfs*28)              | Hm     | -                 | 1 | KSA               | Audo et al       | 2018 |
| <i>MERTK</i>  | NM_006343.2    | c.2214del                      | p.(Cys738Trpfs*32)              | Hm     | F1281             | 1 | Middle East (ksa) | Audo et al       | 2018 |
| <i>IMPG2</i>  | NM_016247.3    | c.189dup                       | p.(Gln64Thrfs*9)                | hmz    | 40                | 1 | Emirates          | Khan A O         | 2019 |
| <i>IMPG2</i>  | NM_016247.3    | c.533+4_533+7del               | (p.?)                           | hmz    | 41                | 1 | Emirates          | Khan A O         | 2019 |
| <i>IMPG2</i>  | NM_016247.3    | c.3262C>T                      | p.(Arg1088*)                    | hmz    | 42                | 1 | Emirates          | Khan A O         | 2019 |
| <i>IMPG2</i>  | NM_016247.3    | 189dup                         | p.(Gln64Thrfs*9)                | hmz    | 43                | 1 | Emirates          | Khan A O         | 2019 |
